# Supplementary material
Source: Springer Nature journal article supplement (https://www.springermedizin.de/resource/supplementary/12874_2007_241_MOESM2_ESM.pdf/9434156)
Supplement: MOESM2 [file 9434156]

Self-reported EM bottle use

EM system always used as instructed?

Yes

No

Sometimes

Never

Self-reported non-adherence to the EM guidelines

• Complete notes

• Some notes

• No notes

Data quality

5

Adherence to the EM guidelines

4

Minor non-adherence to the EM guidelines

3

→ Data included in the analyses

2

Major non-adherence to the EM guidelines

1

→ Data excluded from the analyses
